# Supplementary material for: Multifactorial chromosomal variants regulate polymyxin resistance in extensively drug-resistant Klebsiella pneumoniae
Source: PubMed Central journal article supplement (PMC5885010; doi:10.1099/mgen.0.000158), 2018-02-12
Supplement: mgen-4-158-s001.pdf [file mgen-4-158-s001.pdf]

1 **Multifactorial Chromosomal Variants Regulate Polymyxin Resistance in Extensively**  
2 **Drug-Resistant *Klebsiella pneumoniae***

---

3

4

5 **SUPPLEMENTARY FIGURES AND TABLES**

6

7

8

9 **Table S1.** Oligonucleotides used in this study

| Assay           | Gene        | Forward sequence (5' to 3') | Reverse sequence (5' to 3') | Reference  |
|-----------------|-------------|-----------------------------|-----------------------------|------------|
| PCR             |             |                             |                             |            |
|                 | <i>mgrB</i> | ATT CTG CCG CTT TTG CTG     | CGT TTT GAA ACA AGT CGA TGA | 24         |
| Complementation |             |                             |                             |            |
|                 | <i>mgrB</i> | TTA AGA AGG CCG TGC TAT CC  | AAG GCG TTC ATT CTA CCA CC  | 48         |
|                 | <i>phoP</i> | CAC CAG GGG CCC TTT TTA T   | GCT AAC GCT ATA GCC CAC CA  | This study |
|                 | <i>phoQ</i> | ATA CCC ACA GGA CGT CAT CA  | CAG GTG TCT GAC AGG GAT TA  | 48         |
|                 | <i>pmrB</i> | ACC TAC GCG AAA AGA TTG GC  | GAT GAG GAT AGC GCC CAT GC  | 48         |

10

11 **Table S2.** Broth microdilution values acquired for the 24 clinical isolates

| Strain*       | Resistance Profile <sup>†</sup> |      |      |       |              |      |       |     |      |       |      |     |        |              |       |      |     |             |     |     |       |       |      |      |
|---------------|---------------------------------|------|------|-------|--------------|------|-------|-----|------|-------|------|-----|--------|--------------|-------|------|-----|-------------|-----|-----|-------|-------|------|------|
|               | 1                               |      | 2    | 3     | 4            |      | 5     | 6   |      | 7     | 8    | 9   | 10     | 11           | 12    | 13   | 14  | 15          | 16  |     | 17    |       |      |      |
|               | AMK                             | GEN  | TOB  | CPT   | TZP          | IPM  | MEM   | CFZ | FEP  | CTX   | CAZ  | FOX | CIP    | SXT          | TGC   | ATM  | AMP | SAM         | CHL | FOF | CST   | PMB   | MIN  | TET  |
| ATCC 25922    | ≤2                              | ≤0.5 | ≤0.5 | ≤0.25 | ≤1/4         | ≤0.5 | ≤0.25 | ≤2  | ≤0.5 | ≤0.25 | ≤0.5 | ≤2  | ≤0.125 | ≤0.5/<br>≤16 | ≤0.25 | ≤0.5 | 8   | 8/4         | ≤8  | ≥27 | 0.25  | 0.25  | ≤0.5 | ≤0.5 |
| ATCC 700603   | ≤1                              | ≤8   | ≤8   | ≤4    | 128/<br>64   | ≤0.5 | ≤0.25 | ≥64 | ≤0.5 | 2     | 64   | ≤16 | ≤0.125 | ≤2/<br>128   | ≥4    | ≥32  | >64 | >64/<br>≥32 | ≥32 | ≤12 | 0.5   | 0.5   | ≥16  | 8    |
| ATCC 13883    | ≤0.5                            | ≤0.5 | ≤0.5 | ≤0.25 | 16/4         | ≤0.5 | ≤0.25 | ≤2  | ≤0.5 | ≤0.25 | ≤0.5 | ≤2  | ≤0.125 | ≤0.5/<br>≤32 | ≤1    | ≤0.5 | >64 | >64/<br>≥8  | ≤4  | ≤18 | ≤4    | ≤4    | ≤1   | ≤0.5 |
| ATCC BAA-2146 | >64                             | >64  | >64  | >32   | >128/<br>>64 | >32  | >32   | >64 | >64  | >32   | >64  | >64 | >16    | >64/<br>>128 | ≥4    | >64  | >64 | >64/<br>≥32 | >64 | ≤20 | ≤0.25 | ≤0.25 | ≥64  | >64  |
| 1_GR_13       | >64                             | >64  | >64  | >32   | >128/<br>>64 | ≥64  | >32   | >64 | >64  | >32   | >64  | >64 | >16    | >64/<br>128  | ≥2    | >64  | >64 | >64/<br>>64 | 64  | ≤19 | 16    | ≥8    | ≥16  | >64  |
| 2_GR_12       | >64                             | >64  | >64  | >32   | >128/<br>>64 | ≥64  | >32   | >64 | >64  | >32   | >64  | >64 | >16    | >64/<br>128  | 2     | >64  | >64 | >64/<br>>64 | >64 | ≤20 | 16    | 8     | 16   | >64  |
| 3_GR_13       | >64                             | >64  | >64  | >32   | >128/<br>>64 | ≥16  | ≥8    | >64 | ≥16  | >32   | >64  | 64  | >16    | >64/<br>128  | 2     | >64  | >64 | >64/<br>>64 | ≥32 | ≤22 | 16    | 8     | ≥8   | >64  |
| 4_GR_12       | >64                             | >64  | >64  | >32   | >128/<br>>64 | >64  | >32   | >64 | >64  | >32   | >64  | >64 | >16    | >64/<br>128  | 2     | >64  | >64 | >64/<br>>64 | >64 | 20  | 32    | ≥16   | ≥8   | >64  |
| 5_GR_13       | ≤16                             | ≤4   | ≥8   | >32   | >128/<br>>64 | ≥32  | ≥4    | >64 | >64  | >32   | >64  | >64 | >16    | >64/<br>128  | 2     | >64  | >64 | >64/<br>>64 | >64 | ≤21 | ≥16   | 16    | 16   | >64  |
| 6_GR_12       | ≤8                              | 2    | 8    | >32   | >128/<br>>64 | 32   | ≥8    | >64 | ≥64  | >32   | >64  | >64 | >16    | >64/<br>128  | ≥2    | >64  | >64 | >64/<br>>64 | >64 | 20  | ≤0.5  | ≤1    | ≤8   | >64  |
| 7_GR_13       | 64                              | ≤2   | 64   | >32   | >128/<br>>64 | ≥64  | >32   | >64 | >64  | >32   | >64  | >64 | >16    | >64/<br>128  | ≥2    | >64  | >64 | >64/<br>>64 | >64 | 19  | >64   | ≥64   | 4    | ≤4   |
| 8_GR_13       | >64                             | >64  | >64  | >32   | >128/<br>>64 | >64  | >32   | >64 | >64  | >32   | >64  | >64 | >16    | >64/<br>128  | ≥2    | >64  | >64 | >64/<br>>64 | >64 | ≤19 | 64    | ≥32   | ≥16  | >64  |
| 9_GR_12       | ≥32                             | ≤2   | ≥32  | >32   | >128/<br>>64 | 16   | ≥4    | >64 | >64  | >32   | >64  | 64  | >16    | >64/<br>128  | 2     | >64  | >64 | >64/<br>>64 | >64 | ≤8  | ≥16   | ≥8    | ≤8   | ≤4   |
| 10_GR_13      | 16                              | ≤1   | ≥16  | >32   | >128/<br>>64 | >64  | >32   | >64 | >64  | >32   | >64  | >64 | >16    | >64/<br>128  | 2     | >64  | >64 | >64/<br>>64 | >64 | ≤20 | 64    | ≥32   | ≤4   | ≤4   |
| 11_BR_13      | ≤16                             | ≤0.5 | ≥16  | >32   | >128/<br>>64 | >64  | >32   | >64 | ≥64  | >32   | ≥64  | >64 | >16    | >64/<br>128  | ≤2    | >64  | >64 | >64/<br>>64 | 8   | ≤15 | ≥64   | 64    | ≤4   | ≤2   |
| 12_BR_13      | ≤1                              | >64  | ≥8   | >32   | >128/<br>>64 | ≥64  | >32   | >64 | >64  | >32   | ≥64  | >64 | >16    | >64/<br>128  | ≤2    | >64  | >64 | >64/<br>>64 | >64 | 23  | >64   | >64   | ≤8   | ≤2   |
| 13_GR_14      | ≤32                             | ≤0.5 | ≥16  | >32   | >128/<br>>64 | >64  | >32   | >64 | >64  | >32   | >64  | >64 | >16    | >64/<br>128  | ≤1    | >64  | >64 | >64/<br>>64 | >64 | 20  | 16    | 16    | ≤1   | ≤0.5 |
| 14_GR_14      | ≤32                             | ≤0.5 | ≥16  | >32   | >128/<br>>64 | >64  | >32   | >64 | >64  | >32   | >64  | >64 | >16    | >64/<br>128  | ≤1    | >64  | >64 | >64/<br>>64 | >64 | 20  | ≥32   | ≥16   | ≤2   | ≤1   |
| 15_GR_13      | ≤32                             | ≤1   | ≥16  | >32   | >128/<br>>64 | 32   | ≥8    | >64 | ≥64  | >32   | >64  | 64  | >16    | >64/<br>128  | 2     | >64  | >64 | >64/<br>>64 | >64 | ≤22 | 64    | ≥32   | ≤4   | 1    |

|          |     |      |     |     |              |     |     |     |     |     |     |     |      |             |    |     |     |             |     |     |       |       |     |      |
|----------|-----|------|-----|-----|--------------|-----|-----|-----|-----|-----|-----|-----|------|-------------|----|-----|-----|-------------|-----|-----|-------|-------|-----|------|
| 16_GR_13 | >64 | >64  | >64 | >32 | >128/<br>>64 | ≥8  | ≥16 | >64 | >64 | >32 | >64 | 64  | >16  | >64/<br>128 | ≥2 | >64 | >64 | >64/<br>>64 | 32  | ≤19 | 64    | 64    | ≤8  | >64  |
| 17_GR_14 | >64 | >64  | >64 | >32 | >128/<br>>64 | ≥4  | ≥4  | >64 | >64 | >32 | >64 | 32  | >16  | >64/<br>128 | 2  | >64 | >64 | >64/<br>>64 | ≥16 | ≤20 | 64    | 32    | 4   | >64  |
| 18_GR_14 | ≤32 | ≤0.5 | ≥16 | >32 | >128/<br>>64 | >64 | >32 | >64 | >64 | >32 | >64 | >64 | >16  | >64/<br>128 | 2  | >64 | >64 | >64/<br>>64 | ≥32 | ≤20 | 64    | 64    | 2   | ≤2   |
| 19_GR_14 | ≤32 | ≤0.5 | ≥16 | >32 | >128/<br>>64 | ≥16 | ≥8  | >64 | >64 | >32 | >64 | >64 | >16  | >64/<br>128 | ≥4 | >64 | >64 | >64/<br>>64 | 64  | 21  | 64    | 64    | ≥8  | 8    |
| 20_GR_12 | 64  | 1    | 64  | >32 | >128/<br>>64 | ≥8  | ≥8  | >64 | ≥16 | >32 | >64 | 64  | >16  | >64/<br>128 | ≥2 | >64 | >64 | >64/<br>>64 | ≥32 | ≤22 | 0.125 | ≤0.25 | 16  | >64  |
| 21_GR_13 | ≤4  | ≤4   | ≥8  | >32 | >128/<br>>64 | 8   | ≤2  | >64 | ≥16 | >32 | >64 | >64 | 0.25 | >64/<br>128 | 1  | ≤4  | >64 | >64/<br>>64 | ≤4  | ≥24 | ≤0.25 | 0.125 | ≤1  | ≤0.5 |
| 22_GR_12 | ≤32 | ≤1   | ≥16 | >32 | >128/<br>>64 | ≥16 | ≥8  | >64 | ≥16 | >32 | >64 | 64  | >16  | >64/<br>128 | ≥1 | >64 | >64 | >64/<br>>64 | 32  | 20  | ≤0.25 | ≤0.25 | ≤4  | 1    |
| 23_GR_12 | >64 | >64  | >64 | >32 | >128/<br>>64 | ≥64 | >32 | >64 | >64 | >32 | >64 | >64 | >16  | >64/<br>128 | 8  | >64 | >64 | >64/<br>>64 | >64 | ≤20 | ≥8    | ≥4    | >64 | >64  |
| 24_GR_13 | ≤32 | ≤1   | ≥16 | >32 | >128/<br>>64 | ≥8  | ≥4  | >64 | ≥16 | >32 | >64 | ≥32 | >16  | >64/<br>128 | 2  | >64 | >64 | >64/<br>>64 | >64 | ≤23 | ≤0.25 | ≤0.25 | ≤8  | 2    |

12

13

14 \*Strain identification, numerical order catalogued at IMB\_Country (GR:Greece, BR:Brazil)\_last two digits of isolation year.

15 †Antibiotic resistance as determined by broth microdilution according to CLSI guidelines except fosfomycin (disk diffusion) and tigecycline which

16 followed EUCAST breakpoints. Antibiotic classes tested include **1**, Aminoglycosides (Amikacin, AMK; Gentamicin, GEN; Tobramycin, TOB);

17 **2**, Anti-MRSA cephalosporins (Ceftaroline, CPT); **3**, Antipseudomonal penicillins + β-lactamase inhibitors (Piperacillin-tazobactam, TZP); **4**,

18 Carbapenems (Imipenem, IPM; Meropenem, MEM); **5**, Non-extended spectrum cephalosporins (1<sup>st</sup> and 2<sup>nd</sup> generation) (Cefazolin, CFZ); **6**,

19 Extended-spectrum cephalosporins (3<sup>rd</sup> and 4<sup>th</sup> generation) (Cefepime, FEP; Cefotaxime, CTX, Ceftazidime, CAZ); **7**, Cephamycins (Cefoxitin,

20 FOX); **8**, Fluoroquinolones (Ciprofloxacin, CIP); **9**, Folate pathway inhibitors (Trimethoprim-sulfamethoxazole, SXT); **10**, Glycylcyclines

21 (Tigecycline, TGC); **11**, Monobactams (Aztreonam, ATM); **12**, Penicillins (Ampicillin, AMP); **13**, Penicillins + β-lactamase inhibitors

22 (Amipicillin-sulbactam, SAM); **14**, Phenicol (Chloramphenicol, CHL); **15**, Phosphonic acids (Fosfomycin, FOF); **16**, Polymyxins (Colistin, CST);

23 Polymyxin B, PMB); 17, Tetracyclines (Minocycline, MIN; Tetracycline, TET). The two antibiotics for TZP, SXT and SAM were assayed  
24 separately and both MICs separated with a /. Shading indicates R, Resistant; I, Intermediate; S, Susceptible.

25 **Table S3.** Non-synonomous changes relative to 20\_GR\_12 and PROVEAN prediction

| Strain *              | Polymyxin Profile <sup>†</sup> | Gene        | Variant <sup>‡</sup>                                                | PROVEAN score <sup>§</sup> |
|-----------------------|--------------------------------|-------------|---------------------------------------------------------------------|----------------------------|
| ATCC 700603           | S                              | <i>pmrA</i> | S64A, N131D, L140Q, E199D, N219H                                    | -                          |
|                       |                                | <i>pmrB</i> | T8N, N105S, A228T, Q232E, I242V, N244S, G256R, E272Q, Q356R         | -                          |
|                       |                                | <i>phoP</i> | R34K                                                                | -                          |
|                       |                                | <i>phoQ</i> | Q92K, A106T, E112D, I139V, L163F, V196I, T372S, Q424P, Q482L, Q487E | -                          |
| 1_GR_13 <sup>Δ</sup>  | R                              | <i>pmrB</i> | T140P                                                               | -4.39                      |
| 2_GR_12 <sup>Δ</sup>  | R                              | <i>phoP</i> | A95S                                                                | -2.97                      |
|                       |                                | <i>phoQ</i> | N253T                                                               | -3.86                      |
| 3_GR_13               | R                              | <i>mgrB</i> | D29E                                                                | -3.97                      |
| 4_GR_12 <sup>Δ</sup>  | R                              | <i>phoP</i> | P74L                                                                | -9.98                      |
|                       |                                | <i>phoQ</i> | N253T                                                               | -3.86                      |
| 5_GR_13               | R                              | <i>mgrB</i> | Q30STOP                                                             | -14.86                     |
|                       |                                | <i>pmrA</i> | N131D, G144D, D149E, N219H                                          | -                          |
|                       |                                | <i>pmrB</i> | A5V, N105S, M175V, A228T, G256R                                     | -                          |
| 6_GR_12               | S                              | <i>pmrA</i> | N131D, G144D, D149E, N219H                                          | -                          |
|                       |                                | <i>pmrB</i> | A5V, N105S, M175V, A228T, G256R                                     | -                          |
| 8 GR_13               | R                              | <i>phoQ</i> | G385C                                                               | -8.06                      |
| 9 GR_12               | R                              | <i>phoQ</i> | T281M                                                               | -5.36                      |
| 10 GR_13 <sup>Δ</sup> | R                              | <i>phoQ</i> | A225T, N253T                                                        | -, -3.86                   |
| 13_GR_14 <sup>Δ</sup> | R                              | <i>pmrB</i> | P158R (66)                                                          | -8.68                      |
|                       |                                | <i>phoQ</i> | V446G (65)                                                          | -5.46                      |
| 14_GR_14 <sup>Δ</sup> | R                              | <i>pmrB</i> | P158R (57)                                                          | -8.68                      |
|                       |                                | <i>phoQ</i> | V446G (52)                                                          | -5.46                      |
| 19 GR_14              | R                              | <i>mgrB</i> | C28STOP                                                             | -19.00                     |
| 21_GR_13              | S                              | <i>pmrA</i> | S64A, N131D, L140Q, E199D, N219H, I220N, D221E                      | -                          |
|                       |                                | <i>pmrB</i> | T8N, N105S, A228T, Q232E, I242V, N244S, G256R, E272Q, Q356R, G358A  | -                          |
|                       |                                | <i>phoP</i> | R34K                                                                | -                          |
|                       |                                | <i>phoQ</i> | Q92K, A106T, E112D, I139V, L163F, V196I, T372S, Q424P, Q482L, Q487E | -                          |
| 23_GR_12 <sup>Δ</sup> | R                              | <i>phoP</i> | A95S (57)                                                           | -2.97                      |
|                       |                                | <i>phoQ</i> | N253T (57)                                                          | -3.86                      |

26

27 \*Strains also harboring an IS element disruption in *mgrB* shown as, <sup>Δ</sup>.

28 <sup>†</sup>S, Susceptible (MIC: ≤2 μg/ml); R, Resistant (MIC: >2 μg/ml).

29 <sup>‡</sup>Variant represented as initial amino acid, position and new amino acid; () corresponds to  
30 percentage of reads mapping to alteration if ≤98%.

31 <sup>§</sup>PROVEAN predicted deleterious score which is set to ≤-2.5; -, value not predicted deleterious.

32 **Table S4.** Non-synonymous mutations relative to ATCC 700603

33

| MLST*    | Gene <sup>†</sup>               |                                    |                                                                                                                                                    |                                          |                                                                                     |
|----------|---------------------------------|------------------------------------|----------------------------------------------------------------------------------------------------------------------------------------------------|------------------------------------------|-------------------------------------------------------------------------------------|
|          | <i>mgrB</i>                     | <i>phoP</i>                        | <i>phoQ</i>                                                                                                                                        | <i>pmrA</i>                              | <i>pmrB</i>                                                                         |
| 11 (3)   | -                               | K34R                               | K64R, K92R, T106A, D112E, V139E, F163L, I196V, S372T, P424Q, L482Q, E487Q                                                                          | A64S, D131N, <b>Q140L</b> , D199E, H219N | N8T, S105N, T228A, E232Q, V242I, S244N, <b>R256G</b> , Q272E, R356Q,                |
| 147 (1)  | -                               | K34R                               | K64R, K92R, T106A, D112E, V139E, F163L, I196V, S372T, P424Q, L482Q, E487Q                                                                          | A64S, D131N, <b>Q140L</b> , D199E, H219N | N8T, S105N, <b>T140P</b> , T228A, E232Q, V242I, S244N, <b>R256G</b> , Q272E, R356Q, |
| 258 (16) | <b>C28STOP</b> ,<br><b>D29E</b> | K34R, <b>P74L</b> ,<br><b>A95S</b> | K64R, K92R, T106A, D112E, V139E, F163L, I196V, <b>A225T</b> , <b>N253T</b> , <b>T281M</b> , <b>G385C</b> S372T, P424Q, <b>V446G</b> , L482Q, E487Q | A64S, D131N, <b>Q140L</b> , D199E, H219N | N8T, S105N, <b>P158R</b> , T228A, E232Q, V242I, S244N, <b>R256G</b> , Q272E, R356Q  |
| 383 (2)  | <b>Q30STOP</b>                  | K34R                               | K64R, K92R, T106A, D112E, V139E, F163L, I196V, S372T, P424Q, L482Q, E487Q                                                                          | A64S, <b>Q140L</b> , G144D, D149E, D199E | A5V, N8T, M175V, E232Q, V242I, S244N, Q272E, R356Q                                  |
| 437 (1)  | -                               | K34R                               | K64R, K92R, T106A, D112E, V139E, F163L, I196V, S372T, P424Q, L482Q, E487Q                                                                          | A64S, D131N, <b>Q140L</b> , D199E, H219N | N8T, S105N, T228A, E232Q, V242I, S244N, <b>R256G</b> , Q272E, R356Q                 |
| 2401 (1) | -                               | -                                  | -                                                                                                                                                  | I220N, D221E                             | G358A                                                                               |

34

35 \*Multi-locus sequence type and in brackets, the number of isolates in this group.

36 †Genes *mgrB*, *pmrAB* and *phoPQ* were aligned to ATCC 700603 and represented as initial  
37 amino acid, position and new amino acid. Bold indicates a predicted deleterious variant in  
38 polymyxin-resistant strains according to PROVEAN analysis and an underline identifies this  
39 change also being present in polymyxin-susceptible isolates. Strains impacted by an IS element  
40 disruption in *mgrB* only had flanking regions interrogated to detect variants.

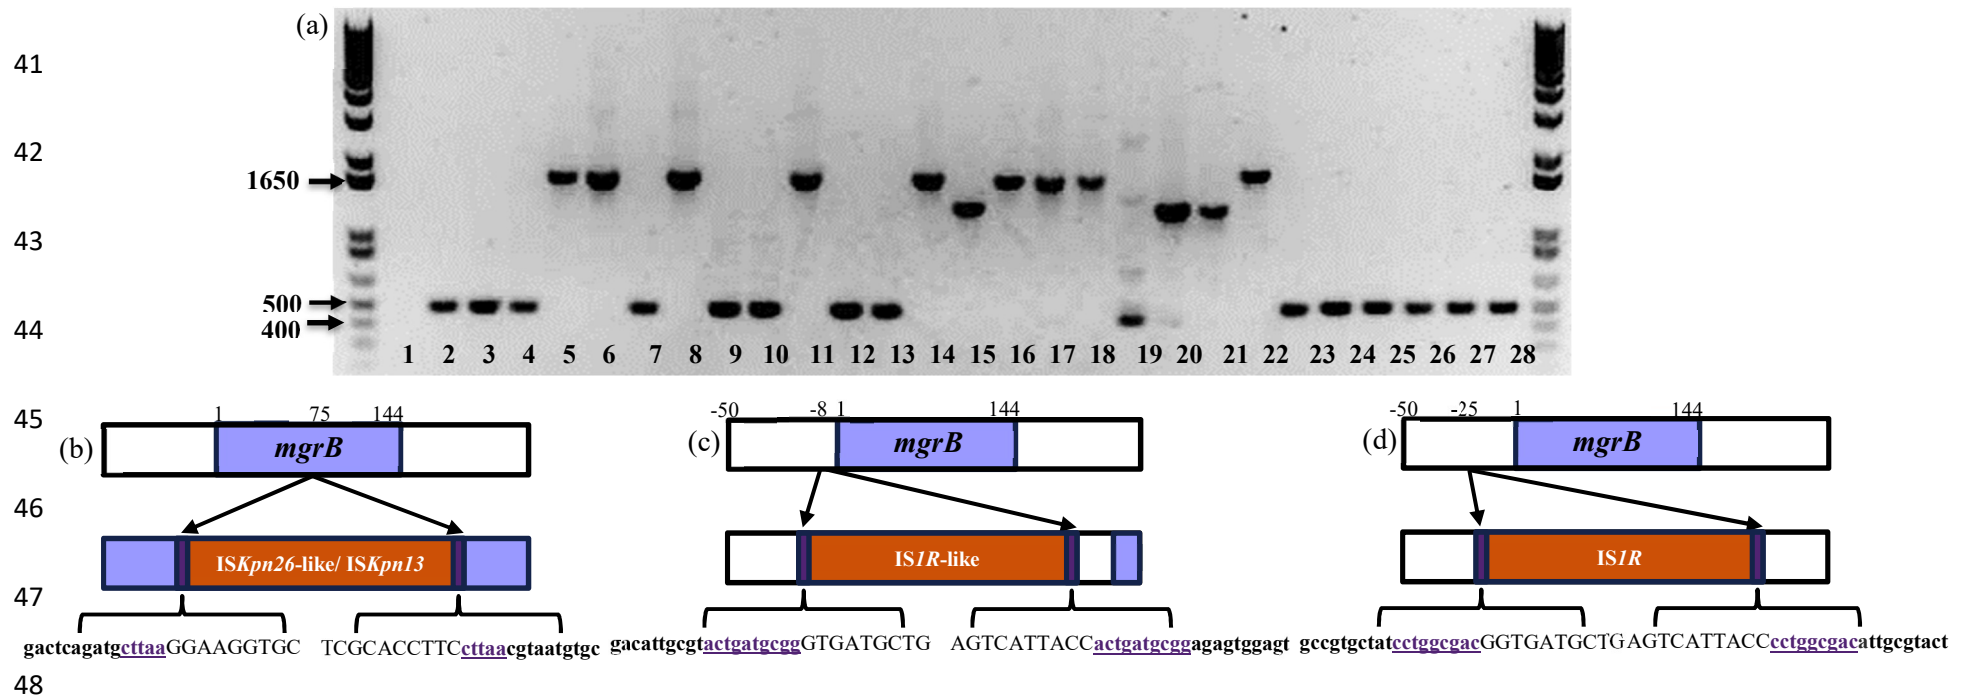

49 **Fig. S1.** Amplification of *mgrB*. (a) PCR products of 1, ATCC 25922 (*E. coli* negative control); 2, ATCC 700603; 3, ATCC 13883; 4, ATCC BAA-2146; 5,  
 50 1\_GR\_13; 6, 2\_GR\_12; 7, 3\_GR\_13; 8, 4\_GR\_12; 9, 5\_GR\_13; 10, 6\_GR\_12; 11, 7\_GR\_13; 12, 8\_GR\_13; 13, 9\_GR\_12; 14, 10\_GR\_13; 15, 11\_BR\_13; 16,  
 51 12\_BR\_13; 17, 13\_GR\_14; 18, 14\_GR\_14; 19, 15\_GR\_13; 20, 16\_GR\_13; 21, 17\_GR\_14; 22, 18\_GR\_14; 23, 19\_GR\_14; 24, 20\_GR\_12; 25, 21\_GR\_13; 26,  
 52 22\_GR\_12; 27, 23\_GR\_12; 28, 24\_GR\_13. (b) IS5-like (*ISKpn26*-like or *ISKpn13* for 12\_BR\_13) element producing 1700 bp amplicon. (c) *ISIR*-like element  
 53 resulting in 1268 bp amplicon in 16\_GR\_13 and 17\_GR\_14 (d) *ISIR* element in 11\_BR\_13 resulting in 1268 bp amplicon.

54  
55  
56  
57  
58  
59  
60

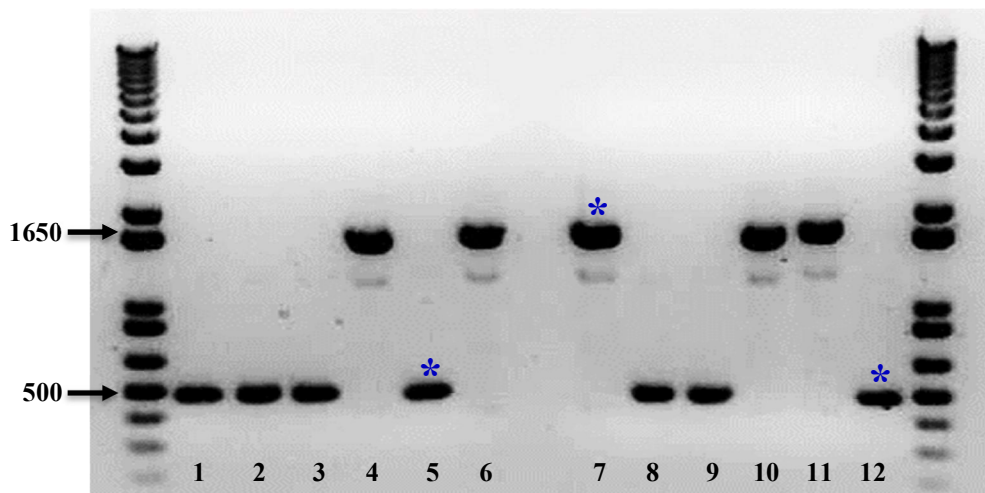

61 **Fig. S2.** Amplification of chromosomal *mcrB* for complemented 13\_GR\_14 (lanes 1 to 6) and  
62 14\_GR\_14 (lanes 7 to 12). Complementation via pTOPO-*mcrB* is shown in lanes 1 to 3 and 7 to 9 and  
63 for pTOPO-*pmrB*, lanes 4 to 6 and 10 to 12. Three colonies were tested per treatment group and  
64 reversion to a polymyxin-susceptible phenotype is indicated by \*. A 500 bp amplicon represents an  
65 intact *mcrB* whilst a 1700 bp amplicon is the result of the IS*Kpn26*-like insertion in *mcrB*.



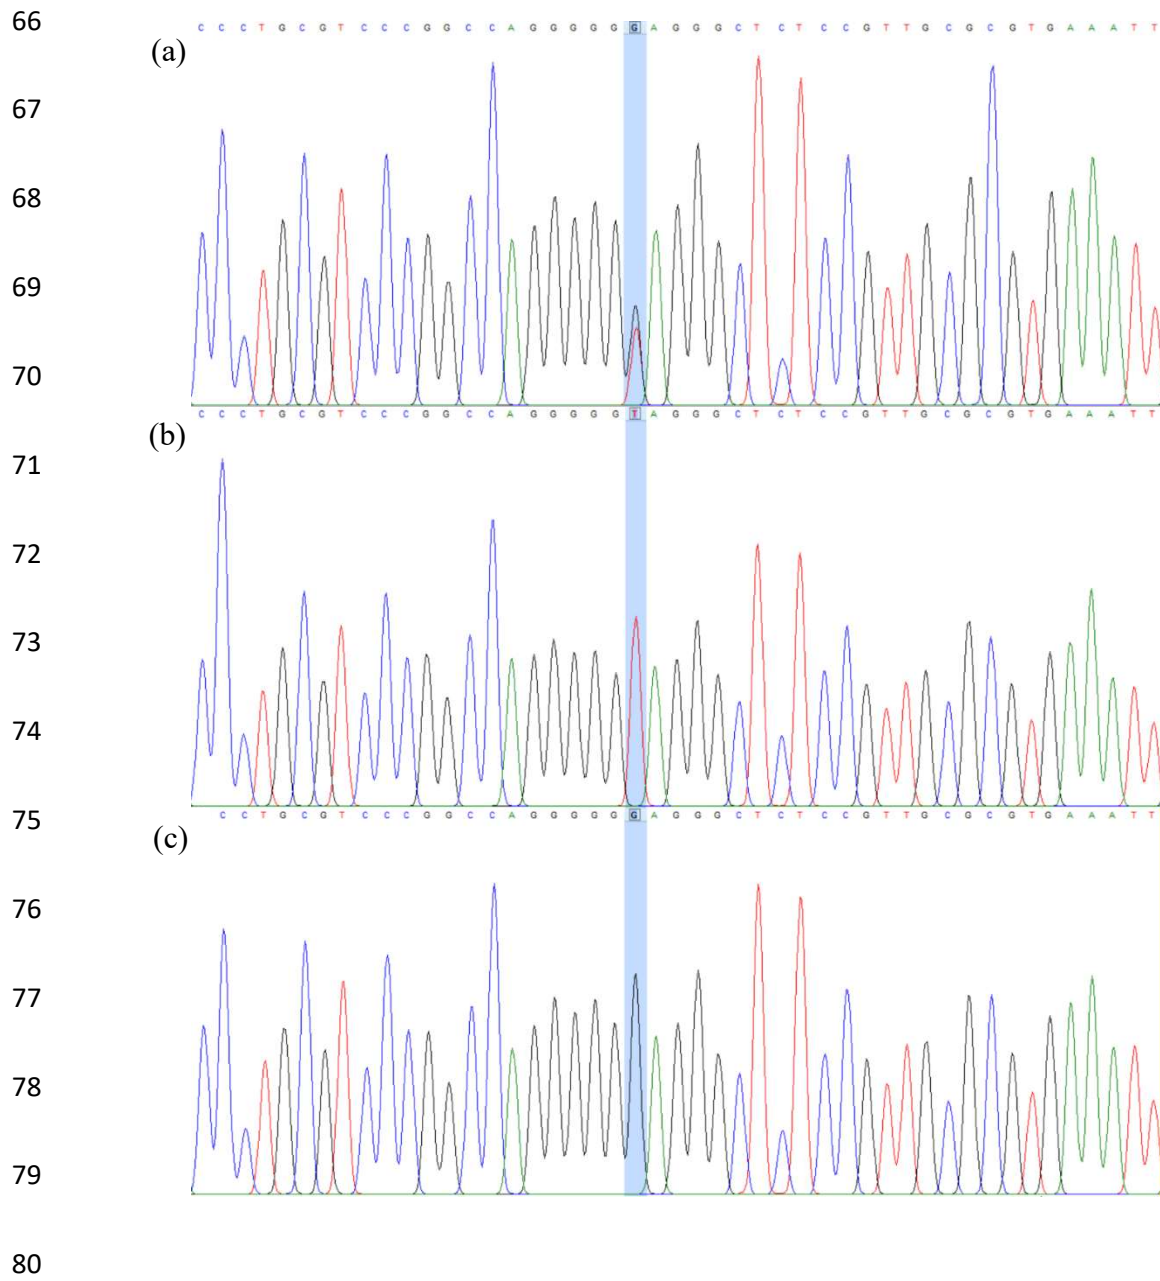

81 **Fig. S3.** Sanger sequencing traces of amplified *phoQ* from (a) DNA extraction of 14\_GR\_14 used for  
 82 whole genome sequencing. (b) complementation of 14\_GR\_14 where susceptibility was recovered by  
 83 pTOPO-*mgrB*. (c) complementation of 14\_GR\_14 where susceptibility was recovered by pTOPO-  
 84 *pmrB*. WT sequence contains **T** at nucleotide position 1337 (shaded) and mutation of **G** causing V446G  
 85 was isolated in condition (c).
